# Supplementary material
Source: Research Square preprint supplement (doi:10.21203/rs.3.rs-9012661/v1)
Supplement: Supplementary file 1 [file 08a334d1d3e5dadc1ef47f14.docx]

**Table S1.** Questionary for the maternal fetal movements evaluation.

| **Question** | **Response** |
| --- | --- |
|  |  |
| Was there any time from 26 weeks of pregnancy that your baby’s movements were less than usual? | No  Once  Two Times  Three or more times |
| In the last 2 weeks did the strength of your baby’s movements? | Increase  Decrease  Stay the same  Unsure |
| In the last 2 weeks did the frequency of your baby’s movements? | Increase  Decrease  Stay the same  Unsure |
| During the last 2 weeks did you notice anytime that your baby was more vigorous than usual? | No  Once  More than once |
| During the last 2 weeks did you feel you baby having hiccups? | Yes  No  Unsure |
