# Supplementary material
Source: Research Square preprint supplement (doi:10.21203/rs.3.rs-9012661/v1)
Supplement: Supplementary file 2 [file 2c7fb7d68cbb27e4e5aa6788.docx]

**Figure S2.** Boxplots of computerized cardiotocography parameters stratified pregnant’ responses to the question “During the last 2 weeks, did you feel your baby having hiccups?”.
