# Supplementary material
Source: Research Square preprint supplement (doi:10.21203/rs.3.rs-9012661/v1)
Supplement: Supplementary file 3 [file 94fd0f356bf2ed963464df6d.docx]

**Table 2.** Baseline characteristics of patients included.

| **Characteristic** | **N = 4191** |
| --- | --- |
|  |  |
| Gestational Age, Weeks  Gestational Weight gain, Kg  Pre-pregnancy BMI, Kg/m2 | 38.2 (1.0)  10.4 (6.1)  25.6 (6.1) |
| Ethnicity |  |
| Caucasican  Black  Afro-Caribbean  South Asian  East Asian | 347 (83%)  17 (4.1%)  14 (3.3%  35 (8.4%)  6 (1.4%) |
| Age, Years | 32.1 (5.5) |
| Gravidity  1  2  ≥ 3 | 167 (40%)  133 (32%)  119 (28%) |
| Parity  0  1  ≥ 2 | 283 (68%)  94 (22%)  42 (10%) |
| Previous Cesarean Section  0  1  ≥2 | 350 (84%)  48 (11%)  21 (5.0%) |
| Miscarriage  0  1  ≥2 | 322 (77%)  68 (16%)  29 (7%) |
| Induced Abortion  0  1  ≥2 | 380 (91%)  31 (7.4%)  8 (2.0%) |
| Fetal Gender |  |
| Male  Female | 216 (52%)  202 (48%) |
| Smoking during pregnancy  No  Yes | 365 (87%)  54 (13%) |
| Gestational Diabetes | 142 (33,89 %) |
| Gestational Hypertension | 42 (10,02 %) |
| Preeclampsia | 0 (0,0 %) |
| Fetal growth restriction | 5 (1,19 %) |

1Frequency (%), Mean (SD);
