# Supplementary material
Source: Research Square preprint supplement (doi:10.21203/rs.3.rs-9012661/v1)
Supplement: Supplementary file 4 [file a86024e5fe85a824dd6f43f6.docx]

**Figure S1.** Boxplots of computerized cardiotocography parameters stratified pregnant’ responses to the question “In the last 2 weeks, did the strength of your baby’s movements…? (Equal, Decreased, or Increased)”.
